# Supplementary material for: Arginine-Dependent Nitric Oxide Generation and S-Nitrosation in the Non-Photosynthetic Unicellular Alga Polytomella parva
Source: MDPI journal article supplement (doi:10.3390/antiox11050949), 2022-05-11
Supplement: s1 [file s1]

### Supplementary Materials:

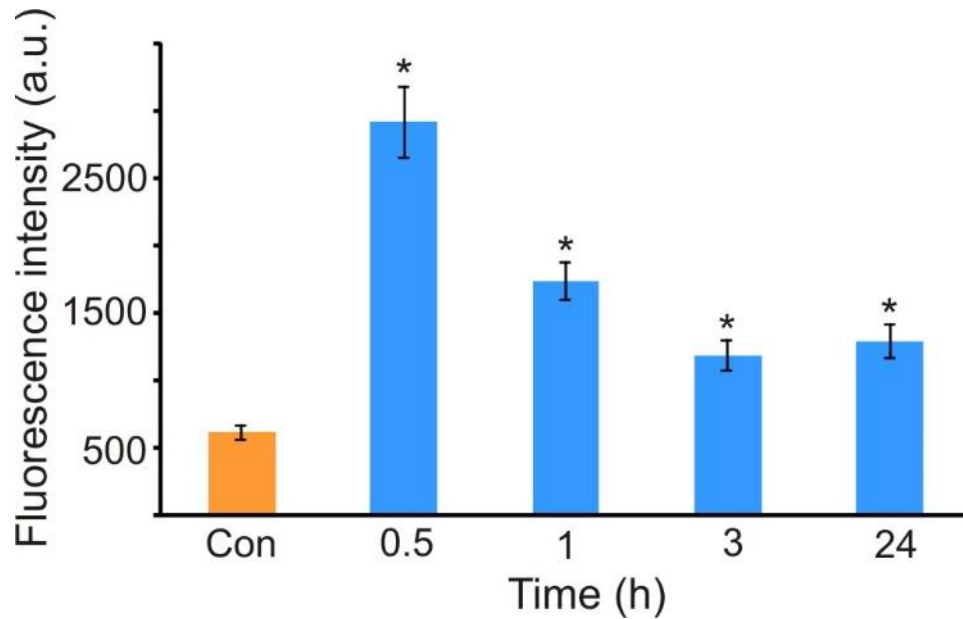

**Figure 1.** Time course analysis of the effect of 1 mM arginine on NO generation. Fluorescence intensity due to intracellular NO was determined using DAF-FM DA and is expressed as arbitrary units per  $10^6$  cells. Cell autofluorescence was subtracted from the total fluorescence obtained. Cells were grown in acetate-containing media and transferred to 1 mM arginine as a nitrogen source \* denotes significant differences between the control and test variants according to the Student's *t* test ( $p$  value  $< 0.01$ ).

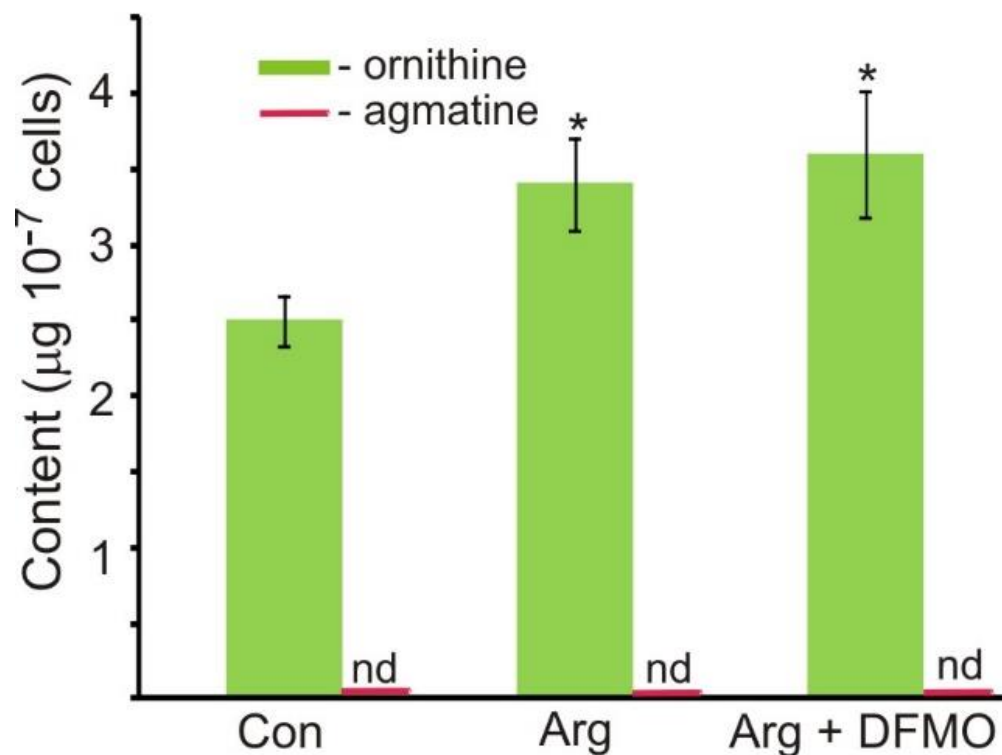

**Figure 2.** Effects of DFMO on ornithine and agmatine contents. Cells were grown in REP (Con) or incubated in acetate-containing medium with 1 mM arginine in the presence and absence of 1 mM DFMO for 3 h. \* denotes significant differences between the control and test variants according to the Student's *t* test ( $p$  value  $< 0.01$ ). nd, not determined.
